# Supplementary material
Source: PubMed Central journal article supplement (PMC489979)

**A**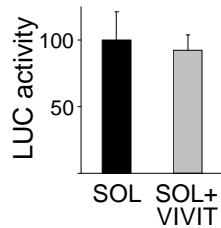**B**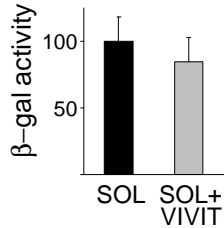

Supplement: pnas_101_29_10590__1.pdf [file pnas_101_29_10590__1.pdf]

**A**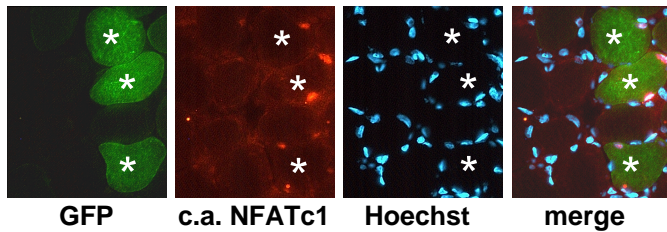**B**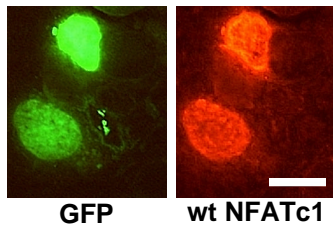**C**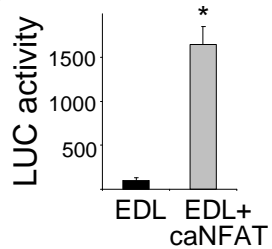

Supplement: pnas_101_29_10590__2.pdf [file pnas_101_29_10590__2.pdf]

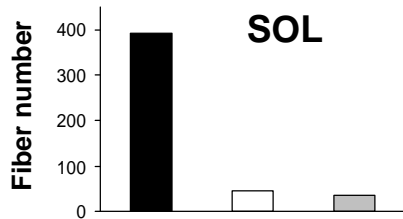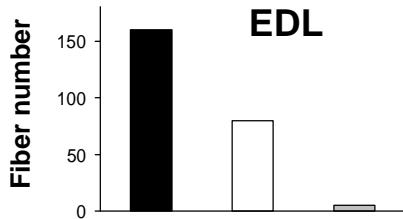

| GFP:       | + | + | - |
|------------|---|---|---|
| MyHC-slow: | + | - | + |

Supplement: pnas_101_29_10590__3.pdf [file pnas_101_29_10590__3.pdf]
